# Supplementary material
Source: publisher figshare collection journal article supplement (https://asha.figshare.com/articles/dataset/_/19386257)

## Supplemental Material S2. Scatter plots between the SR scores and the narrative measures in Study 1.

**Figure S1.** Scatter plots of the error method word scoring and narrative measures.

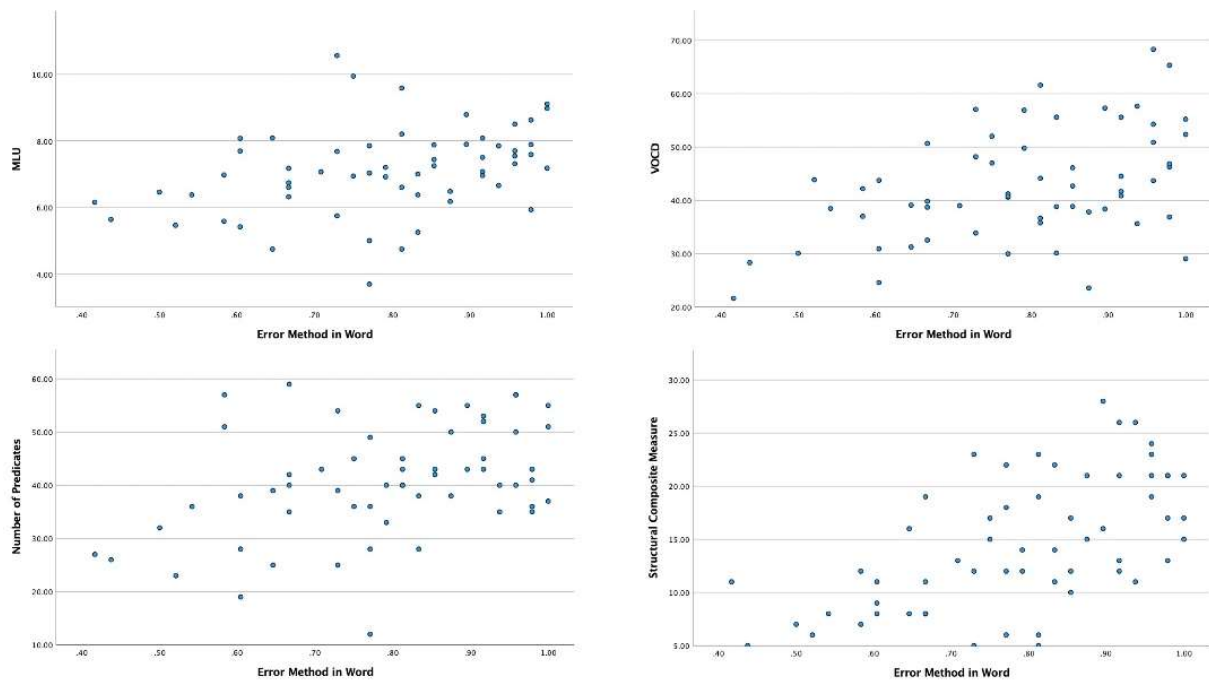

**Figure S2.** Scatter plots of the error method syllable scoring and narrative measures.

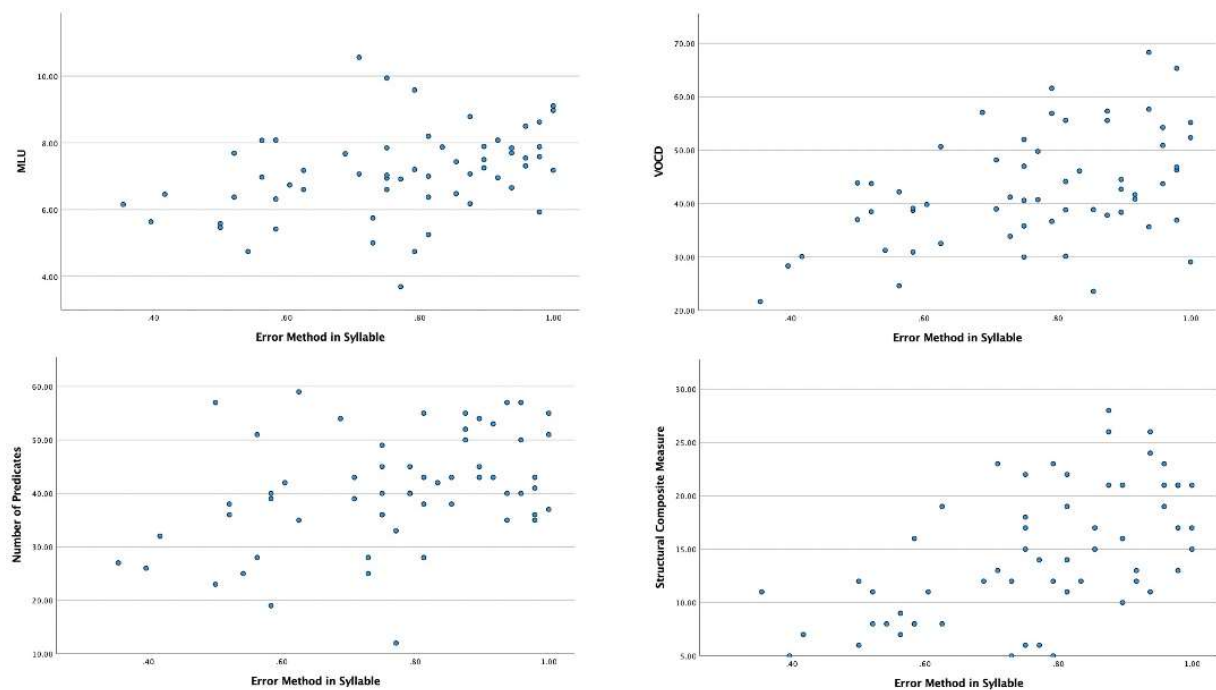

**Figure S3.** Scatter plots of the binary scoring and narrative measures.

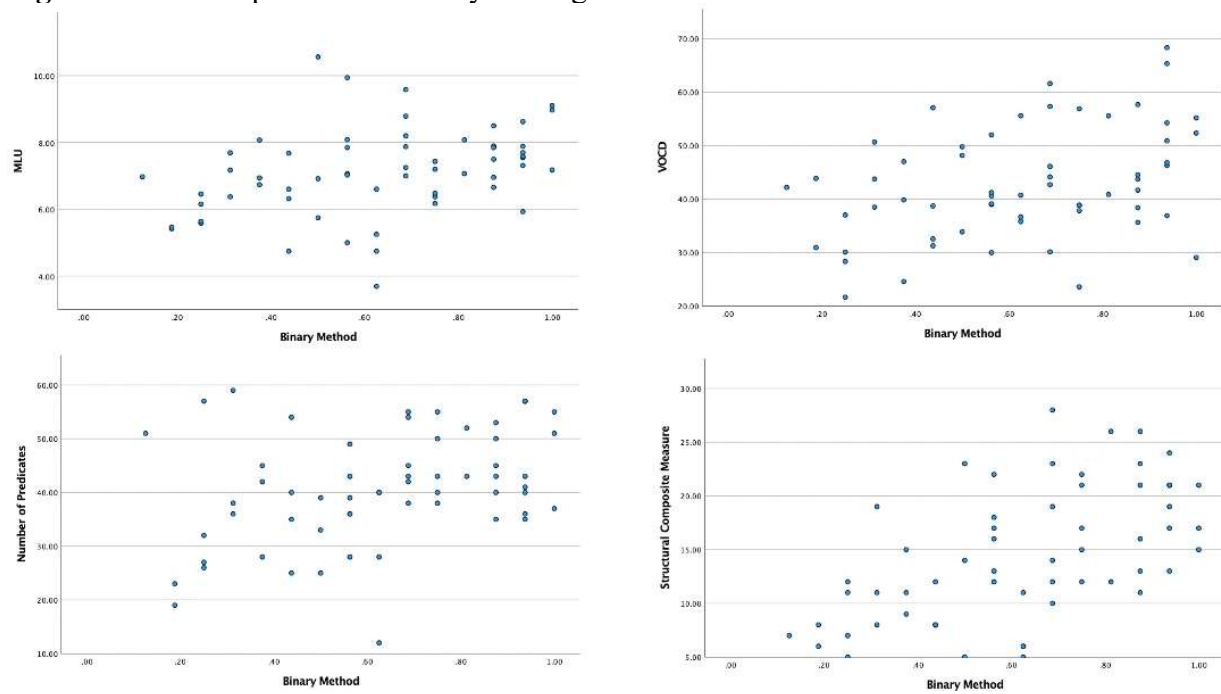

**Figure S4.** Scatter plots of the core element scoring and narrative measures.

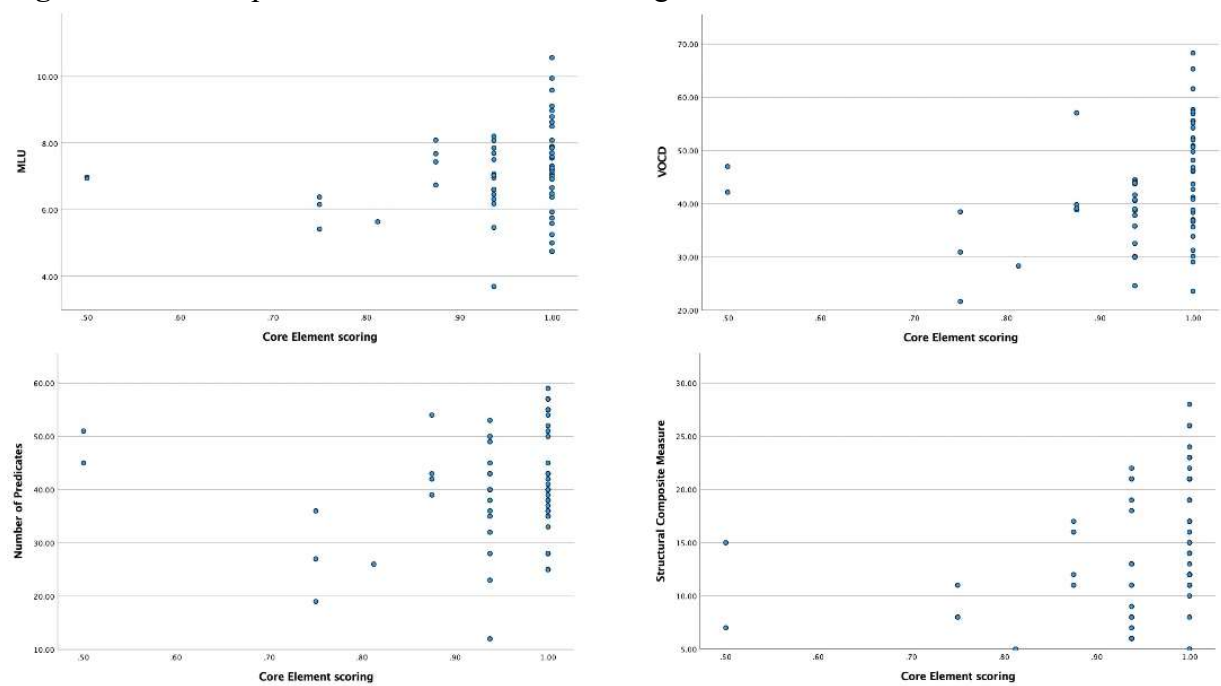

**Figure S5.** Scatter plots of the percent of correct syllable scoring and narrative measures.

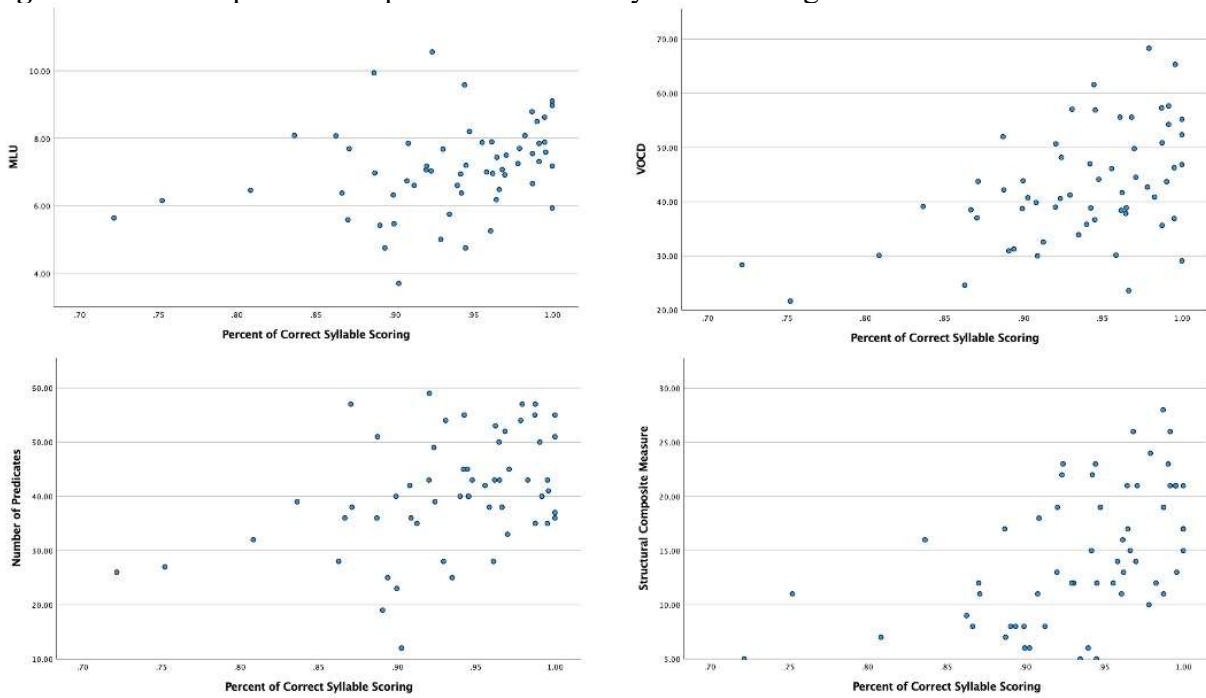

Supplement: Supplementary file 1 [file 1]
