# Supplementary material
Source: publisher figshare collection journal article supplement (https://asha.figshare.com/articles/dataset/_/19386257)
Supplement: Supplementary file 2 [file 1]

#### Supplemental Material S4. Examples of the narrative measures.

| Structure type  | Subtype             | Example                                                                                                                    |
|-----------------|---------------------|----------------------------------------------------------------------------------------------------------------------------|
| Predicate       | Verb                | 然后 小 鸟 妈妈 爬 到 树上。<br>Then little bird mom <b>climbed</b> onto the tree<br>Then, the little bird mom climbed onto the tree. |
|                 | Predicate adjective | 小猫 真 生气。<br>The cat so <b>angry</b><br>The cat is so angry.                                                                |
|                 | Progressive         | 小狗 在 捉 老鼠。<br>The dog ProM catch mouse<br>The dog is catching the mouse.                                                   |
| Aspect Marker   | Perfective          | 然后 小 男孩 拣回 了 自己的 球。<br>Then little boy got back PerM his ball<br>Then the little boy got his ball back.                    |
|                 | -                   | 小猫 吃 了 一 条 鱼。<br>The cat ate PerM one CL fish<br>The cat ate a fish.                                                       |
| Passive         | -                   | 它的 腿 被 狐狸 吃了。<br>Its leg PASS fox eat SFP<br>Its leg was eaten by the fox.                                                 |
| Relative Clause | -                   | 看到 掉 到 河里的 球 了。<br>Saw dropped RP river LP ball SFP<br>Saw the ball that dropped in the water.                             |

*Note.* ProM = progressive marker; PerM = perfective marker; CL = classifier; PASS = passive marker; SFP = sentence final particle; RP = resultative particle; LP = linking particle.
