# Supplementary material
Source: publisher figshare collection journal article supplement (https://asha.figshare.com/articles/dataset/_/19386257)
Supplement: Supplementary file 3 [file 1]

## Supplemental Material S1. Examples of a sample response and its scoring procedures.

Target sentence:

小 老鼠 吃 了 一 块 美味的 巧克力。  
xiao3 lao3shu3 chi1 le yi1 kuai4 mei3we4de qiao3ke1li4  
Little mouse eat PerM one CL delicious chocolate  
The little mouse has eaten a piece of delicious chocolate.

Child's response:

小 老鼠 吃 了 一 块 好吃的 巧克力。  
xiao3 lao3shu3 chi1 le yi1 kuai4 hao3chi1de qiao3ke1li4  
Little mouse eat PerM one CL tasty chocolate  
The little mouse has eaten a piece of *tasty* chocolate.

Error method – word: The child substituted the word “美味” with “好吃”, which was considered as one word error. A score of **2** (1 error) was given for this response using the error method in word system.

Error method – syllable: The child substituted two syllables “美味” with “好吃”, which was considered as two syllable errors. A score of **1** (two to three errors) was given for this response using the error method in syllable system.

Binary method: As this response was not a completely accurate repetition of the target, a score of **0** was given using the binary method.

Core element scoring: The core element in the target sentence is the aspect marker structure (verb + aspect marker + noun). The target core element is present in the child's response, so a score of **1** was given using the core element scoring.

Percent of correct syllable scoring: The target sentence has a total of 13 syllables and 11 of them were repeated correctly in the response. The percent of correct syllable scoring thus gives a score of 11/13, which is **0.85**.
