# Supplementary material
Source: publisher figshare collection journal article supplement (https://asha.figshare.com/articles/dataset/_/19386257)
Supplement: Supplementary file 4 [file 1]

**Supplemental Material S3.** Descriptive data of children's scores on MSRT and narrative measures in Study 1.

| <b>Measure</b>                     | <b>Range</b> | <b>Mean</b> | <b><i>SD</i></b> |
|------------------------------------|--------------|-------------|------------------|
| Error method – word                | 0.42–1.00    | 0.79        | 0.15             |
| Error method – syllable            | 0.35–1.00    | 0.77        | 0.17             |
| Binary method                      | 0.13–1.00    | 0.63        | 0.25             |
| Core element method                | 0.50–1.00    | 0.94        | 0.11             |
| Percent of correct syllable method | 0.72–1.00    | 0.93        | 0.06             |
| MLU-w                              | 3.69–10.56   | 7.11        | 1.30             |
| VOCD                               | 21.65–68.32  | 42.75       | 10.39            |
| Number of predicates               | 12–59        | 40.69       | 10.40            |
| Structural composite               | 5–28         | 14.63       | 6.14             |
